# Supplementary material for: Empirical study on reform and countermeasures of integrated care for older people based on SWOT-CLPV model: insights from K city pilot project in China
Source: Research Square preprint supplement (doi:10.21203/rs.3.rs-8283743/v1), 2026-01-09
Supplement: Supplementary file 1 [file 2c4744259569d946852aac45.docx]

**Supplementary File 1. Interview Outlines**

1. **Interview outline for the administrators**

- During the practice of ICOPE services, what do you think that ICOPE has provided support for other local health service initiatives?

- Do you think ICOPE services are meaningful? If so, what are their significance?

- How about the effectiveness of ICOPE services?

- What challenges or issues do you think are faced in practicing ICOPE services? (Including but not limited to funding, personnel, facilities, medical support, incentives, etc.)

- How do you plan to develop the talents for institutions providing ICOPE services?

- How do you consider the sustainable development of institutions offering ICOPE services?

- What are the main challenges encountered in cross-institutional collaboration (Such as the collaboration between hospitals, community health service centers, social organizations, etc.)?

- As we all know, there are no unified stands for ICOPE services. Do you think is it urgent to make the relevant standards to guide the practice? As the administrator, please give us some plans from you.

- Based on your professional experience, please give us your perspectives of ICOPE services from five dimensions: institutional, systemic, managerial, resource, and technical.

- What suggestions or recommendations do you have for advancing the development of ICOPE services in the future? How can we better meet the demand of the elderly and improve service quality?

1. **Interview outline for the service providers**

- Please talk about the advantages and disadvantages of this pilot project based on ICOPE? Do you support the practice of ICOPE services? What is your overall perspective of integrating ICOPE into local home-based integrated elderly care and medical services project?

- Do you have some obstacles to give the ICOPE service to the elderly and make more stress or workload to your original work?

- Do you think the current service processes, contents, scales and information administrative systems are reasonably designed? Do you have any suggestions for improvement?

- What benefits has the practice of the ICOPE affected your income, career development, and professional identity? Do you have some suggestions to adjust the negative aspects.

- Do you think the capabilities of current multidisciplinary service teams in your institution are competent with the practice of ICOPE? If not, what types of talents are lacking?

- How do the multidisciplinary service teams in your institution collaborate and divide responsibilities? Are there some communication or collaboration barriers among team members?

- Has your institution established feedback and quality control mechanisms during the practice of ICOPE? If so, are they effective and efficient?

- What specific issues have you encountered during the practice of ICOPE, and what optimization suggestions do you have? Please provide examples.

1. **Interview outline for the elderly recipients**

- What is your feeling of this service?

- What is your overall evaluation of this service? Do you have any suggestions for improvement?

- Weather the current service for you meet your needs or not? If not, please tell us your specific needs in more details.

- How do you know about this project, for example from promulgation, pamphlet or your neighbor?

- Do you think the current supervision mechanisms for this service need further improvement?

- What specific issues have you encountered during the service process? Please provide detailed explanations.
